# Supplementary material for: The Human Glioblastoma Cell Culture Resource: Validated Cell Models Representing All Molecular Subtypes
Source: PubMed Central journal article supplement — eBioMedicine. 2015 Aug 15;2(10):1351–63. doi: 10.1016/j.ebiom.2015.08.026 (PMC4634360; doi:10.1016/j.ebiom.2015.08.026), 2015-08-15
Supplement: mmc1.pdf [file mmc1.pdf]

## SUPPLEMENTAL FIGURES

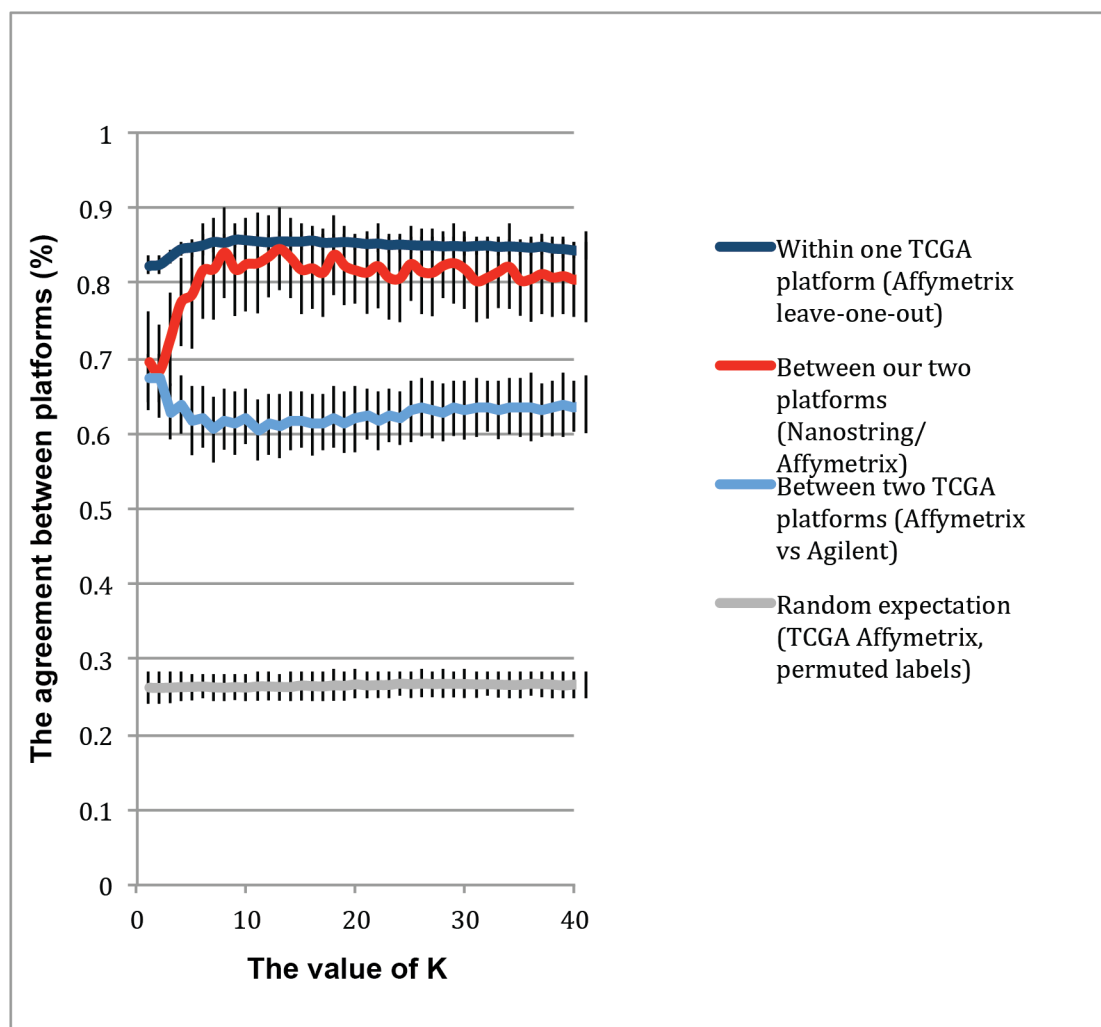

**Figure S1. The K nearest neighbor classifier assigns molecular subclass to each sample based on the K most similar reference samples in the TCGA data. Related to figure 2.** We noted that the classifications differed somewhat between our Nanostring and Affymetrix profiles (red curve). Depending on the value of K, the agreement is >80% for K>6 (red curve). The optimum of the curve agrees well with the value of K=11 selected from leave-one-out agreement within one platform (dark blue curve). To address whether 80% is an acceptable level of agreement, we consider two points of reference. First, we consider the agreement in classification when using the two different datasets available from the TCGA, collected on Affymetrix and Agilent platforms for the same set of samples: in this case, the agreement is somewhat lower (between 60 and 68%, light blue curve). The classification stability is thus higher between our Nanostring and Affymetrix profiles, than between TCGA's own two platforms. As a second point of reference, note that KNN classification among four approximately equally sized classes has only ~25% expected agreement.

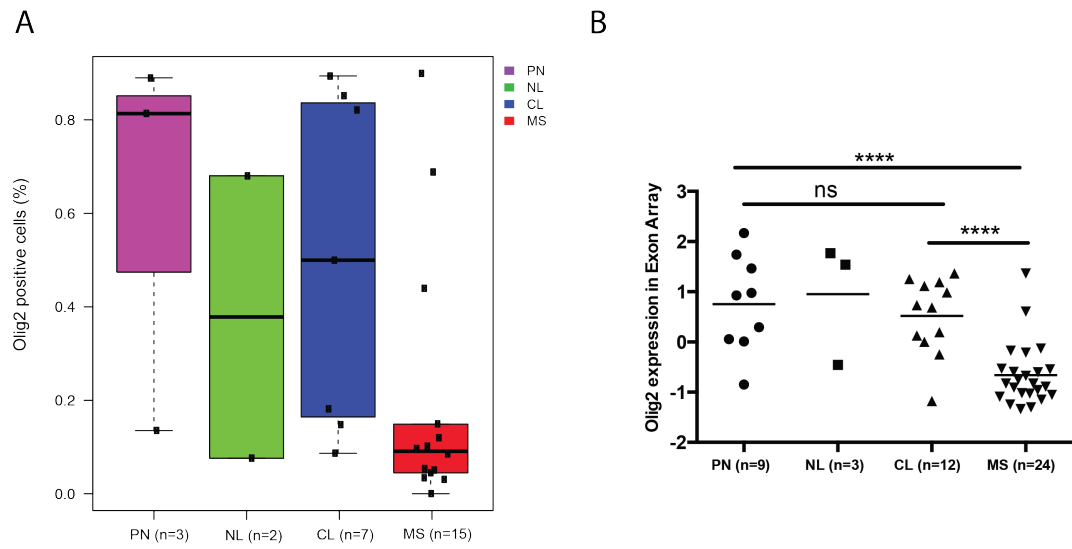

**Figure S2. The protein (A) and mRNA (B) levels of Olig2 expression in Proneural (PN), Neural (NL), Classical (CL) and Mesenchymal (MS) subtypes. Related to Figure 4.**

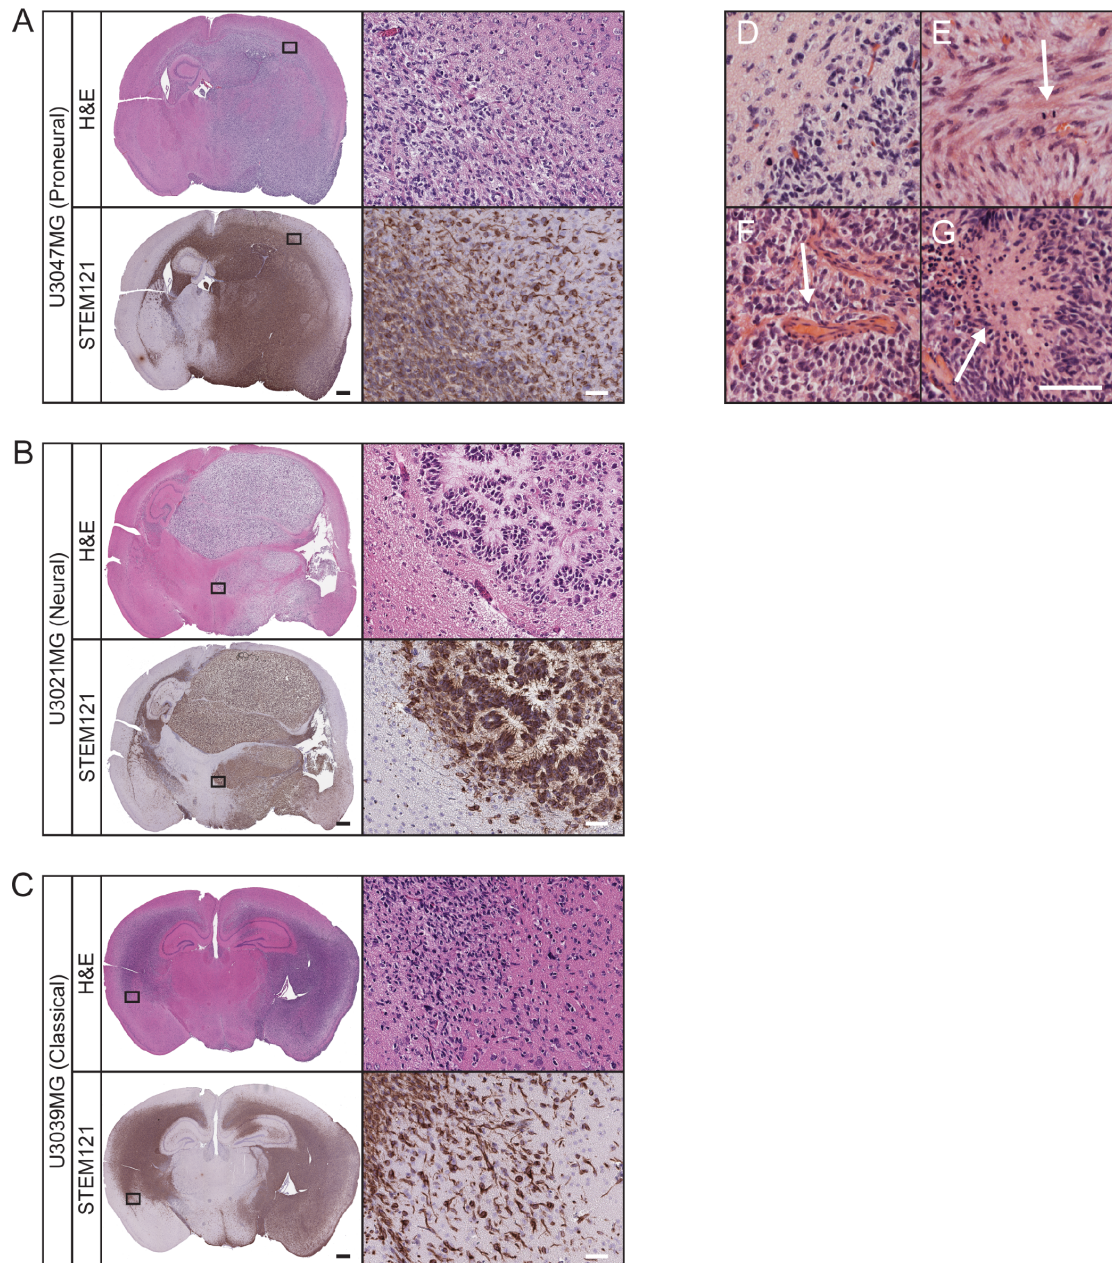

**Figure S3. Secondary tumors in NOD-SCID mice. Related to Figure 5.**

Representative sections from tumors induced by a proneural GC line (A, U3047MG), a neural GC line (B, U3021MG), and a classical GC line (C, U3039MG) were stained with H&E and antibodies against STEM121. Black scale bar=500  $\mu$ m, white scale bar=50  $\mu$ m. (D-G) H&E staining demonstrating (D) diffuse invasion, (E) mitosis (arrow), (F) microvascular proliferation (arrow) and (G) pseudopalisading necrosis (arrow), four features of high-grade glioma in the human GC xenografts. Scale bar=50  $\mu$ m.

**A****GC lines generating macroscopic tumors**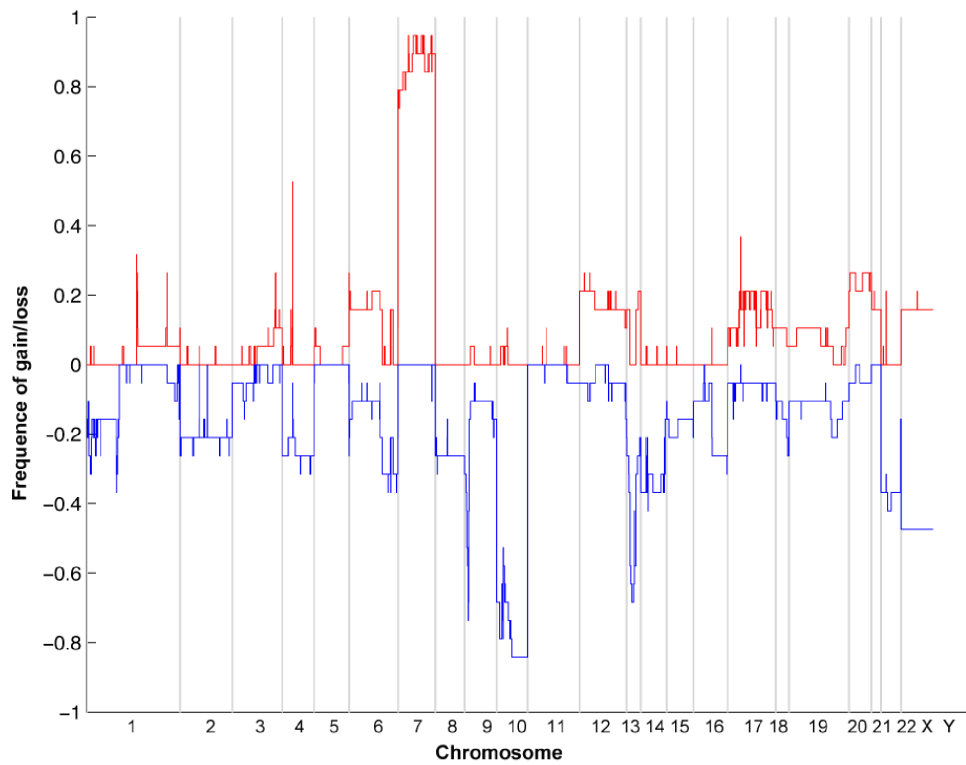**B****GC lines not generating macroscopic tumors**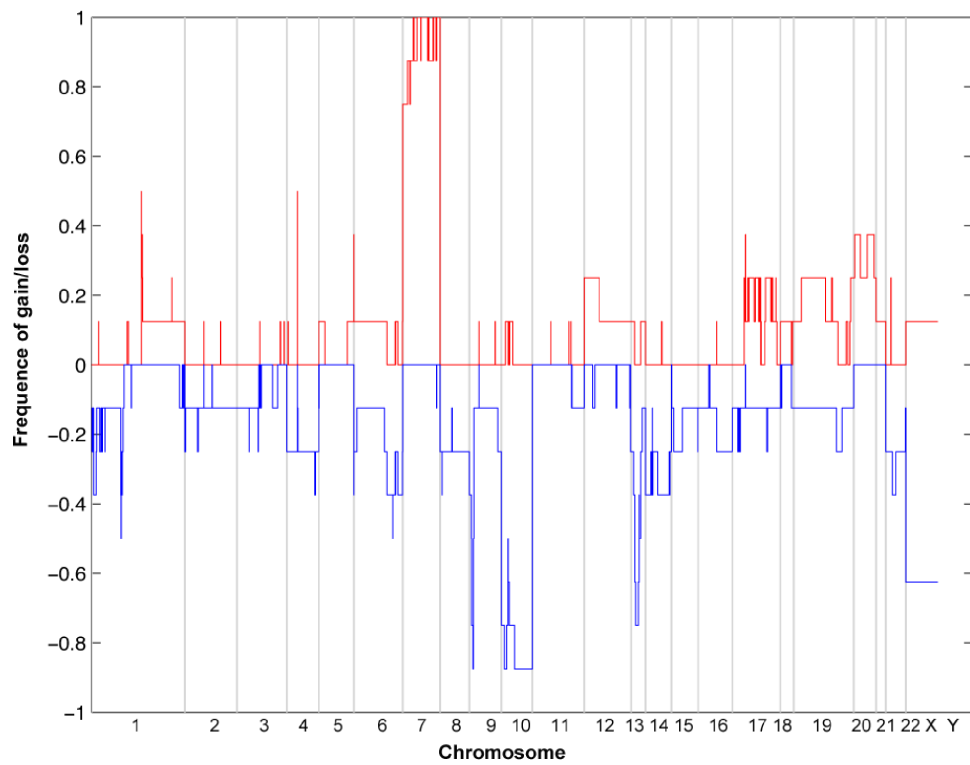**Figure S4. Analysis of the variation in genomic copy number. Related to Figure 6.**

(A) GC lines generating macroscopic tumors, (n=20) and (B) GC lines not generating such tumors, (n=10).

**SUPPLEMENTAL TABLES**

**Table S1. The patient cohort and cell lines established**

| Diagnosis                     | Number of patients | Sex       |           | Age (years) |              | Number of recurrent samples | Cell lines from recurrent samples | Total number of samples | Total number of cell lines | Overall success rate (%) |
|-------------------------------|--------------------|-----------|-----------|-------------|--------------|-----------------------------|-----------------------------------|-------------------------|----------------------------|--------------------------|
|                               |                    | Male      | Female    | Mean        | Range        |                             |                                   |                         |                            |                          |
| <b>All glioma</b>             | <b>101</b>         | <b>56</b> | <b>45</b> | <b>60.7</b> | <b>21-82</b> | <b>9</b>                    | <b>1</b>                          | <b>114</b>              | <b>54</b>                  | <b>47.4</b>              |
| <b>Grade IV</b>               | <b>83</b>          | <b>48</b> | <b>35</b> | <b>62.7</b> | <b>21-82</b> | <b>7</b>                    | <b>1</b>                          | <b>95</b>               | <b>53</b>                  | <b>55.8</b>              |
| Glioblastoma                  | 82                 | 47        | 35        | 62.5        | 21-82        | 7                           | 1                                 | 94                      | 53                         | 56.4                     |
| Gliosarcoma                   | 1                  | 1         | 0         | 78          | -            | 0                           | -                                 | 1                       | 0                          | 0                        |
| <b>Grade III</b>              | <b>13</b>          | <b>4</b>  | <b>9</b>  | <b>50.5</b> | <b>26-73</b> | <b>2</b>                    | <b>0</b>                          | <b>13</b>               | <b>1</b>                   | <b>7.7</b>               |
| Anaplastic astrocytoma        | 4                  | 0         | 4         | 45.8        | 29-63        | 1                           | -                                 | 4                       | 1                          | 25                       |
| Anaplastic oligodendroglioma  | 9                  | 4         | 5         | 52.6        | 26-73        | 1                           | 0                                 | 9                       | 0                          | 0                        |
| <b>Grade II</b>               | <b>5</b>           | <b>4</b>  | <b>1</b>  | <b>55.6</b> | <b>42-68</b> | <b>0</b>                    | <b>0</b>                          | <b>6</b>                | <b>0</b>                   | <b>0</b>                 |
| Oligodendroglioma             | 4                  | 3         | 1         | 55.3        | 42-68        | 0                           | -                                 | 5                       | 0                          | 0                        |
| Pleomorphic xanthoastrocytoma | 1                  | 1         | 0         | 57          | -            | 0                           | -                                 | 1                       | 0                          | 0                        |

**Table S2. Comprehensive GC line information**

| GC line              | Patient data |     |                 |     | Cells           |                 |                 |                 | Tissue          |             | Expression of cell line markers (%) |      |        |      |       | Proliferative capacity <sup>d</sup> |
|----------------------|--------------|-----|-----------------|-----|-----------------|-----------------|-----------------|-----------------|-----------------|-------------|-------------------------------------|------|--------|------|-------|-------------------------------------|
|                      | Age (years)  | Sex | Survival (days) | STR | Passages        |                 | Subtype         |                 | NS <sup>b</sup> | IDH1 status | Tumor <sup>c</sup>                  | Sox2 | Nestin | GFAP | Olig2 |                                     |
|                      |              |     |                 |     | EA <sup>a</sup> | NS <sup>b</sup> | EA <sup>a</sup> | NS <sup>b</sup> |                 |             |                                     |      |        |      |       |                                     |
| U3002MG              | 74           | F   | 596             | N   | 11              | ND              | CL              | ND              | ND              | WT          | ND                                  | ND   | ND     | ND   | ND    | LP                                  |
| U3004MG              | 70           | M   | 134             | Y   | 6               | 13              | CL              | CL              | CL              | WT          | +                                   | 100  | 98.7   | 91.8 | 85.2  | ND                                  |
| U3005MG              | 65           | M   | 26              | N   | 5               | ND              | PN              | ND              | ND              | WT          | +                                   | ND   | ND     | ND   | ND    | IP                                  |
| U3008MG              | 64           | F   | 38              | Y   | 9               | 12              | NL              | MS              | CL              | WT          | +                                   | 100  | 99.5   | 92.2 | 7.8   | HP                                  |
| U3009MG              | 60           | M   | 174             | Y   | 11              | 12              | CL              | CL              | MS              | WT          | +                                   | 100  | 99.6   | 2.1  | 89.4  | IP                                  |
| U3013MG              | 78           | F   | 122             | Y   | 6               | ND              | PN              | ND              | ND              | WT          | +                                   | 100  | 99.4   | 24.6 | 13.5  | HP                                  |
| U3016MG              | 70           | M   | 136             | N   | 7               | ND              | PN              | ND              | ND              | WT          | ND                                  | ND   | ND     | ND   | ND    | HP                                  |
| U3017MG              | 68           | M   | 442             | Y   | 4               | 8               | CL              | CL              | NL              | WT          | +                                   | 99.4 | 99.5   | 87.2 | 14.7  | IP                                  |
| U3019MG              | 82           | F   | 117             | N   | 11              | ND              | PN              | ND              | ND              | WT          | ND                                  | ND   | ND     | ND   | ND    | ND                                  |
| U3020MG              | 68           | M   | 160             | N   | 10              | ND              | MS              | ND              | ND              | WT          | ND                                  | ND   | ND     | ND   | ND    | HP                                  |
| U3021MG              | 50           | M   | 387             | Y   | 4               | ND              | NL              | ND              | ND              | WT          | +                                   | 100  | 99.6   | 93.6 | 68.2  | HP                                  |
| U3024MG              | 73           | F   | 170             | Y   | 5               | 11              | MS              | MS              | PN              | WT          | +                                   | 98.8 | 94.8   | 36.7 | 68.8  | HP                                  |
| U3027MG              | 44           | M   | 766             | Y   | 7               | ND              | MS              | ND              | ND              | WT          | ND                                  | ND   | ND     | ND   | ND    | ND                                  |
| U3028MG              | 72           | F   | 496             | N   | 6               | ND              | CL              | ND              | ND              | WT          | ND                                  | ND   | ND     | ND   | ND    | ND                                  |
| U3029MG              | 70           | F   | 58              | Y   | 5               | ND              | MS              | ND              | ND              | WT          | +/-                                 | ND   | ND     | ND   | ND    | ND                                  |
| U3031MG              | 65           | F   | 468             | Y   | 7               | ND              | MS              | ND              | ND              | WT          | +                                   | 100  | 99.1   | 7.2  | 3.1   | ND                                  |
| U3033MG              | 58           | M   | 178             | Y   | 5               | ND              | PN              | ND              | ND              | WT          | ND                                  | ND   | ND     | ND   | ND    | IP                                  |
| U3034MG              | 73           | M   | 539             | Y   | 11              | 13              | MS              | MS              | MS              | WT          | +/-                                 | 100  | 98.4   | 20.9 | 4.5   | IP                                  |
| U3035MG              | 55           | F   | 578             | Y   | 6               | 9               | MS              | MS              | MS              | WT          | +/-                                 | 100  | 100    | 45.7 | 3.4   | IP                                  |
| U3037MG              | 60           | M   | 333             | Y   | 5               | 7               | MS              | MS              | NL              | WT          | -                                   | 100  | 99.5   | 6.1  | 9.7   | IP                                  |
| U3039MG              | 38           | M   | 994             | Y   | 8               | 12              | CL              | CL              | CL              | WT          | +                                   | 100  | 98.0   | 65.8 | 50.0  | LP                                  |
| U3042MG              | 67           | M   | 202             | Y   | 4               | 8               | CL              | CL              | CL              | WT          | +                                   | 100  | 100    | 80.2 | 82.1  | LP                                  |
| U3046MG              | 73           | M   | 186             | Y   | 4               | 7               | MS              | CL              | NL              | WT          | +                                   | 100  | 99.5   | 56.2 | 44.0  | IP                                  |
| U3047MG              | 66           | F   | 496             | Y   | 5               | ND              | PN              | ND              | ND              | WT          | +                                   | 100  | 5.9    | 7.9  | 81.4  | IP                                  |
| U3048MG              | 77           | M   | 279             | Y   | 7               | ND              | CL              | ND              | ND              | WT          | ND                                  | ND   | ND     | ND   | ND    | ND                                  |
| U3051MG              | 72           | M   | 493             | N   | 6               | 9               | MS              | MS              | PN              | WT          | +/-                                 | 100  | 100    | 100  | 89.9  | ND                                  |
| U3053MG              | 64           | M   | 277             | Y   | 6               | 8               | MS              | MS              | PN              | WT          | +/-                                 | 100  | 100    | 88.1 | 14.9  | LP                                  |
| U3054MG <sup>e</sup> | 60           | F   | 611             | Y   | 5               | ND              | MS              | ND              | ND              | WT          | +                                   | 100  | 84.9   | 0.2  | 0.0   | HP                                  |
| U3056MG              | 68           | F   | 110             | N   | 6               | ND              | CL              | ND              | ND              | WT          | ND                                  | ND   | ND     | ND   | ND    | IP                                  |

**Table S2. Comprehensive GC line information**

|                      |    |   |                  |   |    |    |                 |    |    |    |     |      |      |      |      |    |
|----------------------|----|---|------------------|---|----|----|-----------------|----|----|----|-----|------|------|------|------|----|
| U3060MG              | 60 | M | 493              | Y | 10 | ND | MS              | ND | ND | WT | ND  | ND   | ND   | ND   | ND   | ND |
| U3062MG              | 76 | F | 166              | N | 5  | ND | MS              | ND | ND | WT | ND  | ND   | ND   | ND   | ND   | ND |
| U3065MG              | 77 | M | 127              | Y | 10 | 9  | MS <sup>f</sup> | PN | PN | WT | +   | 99.0 | 100  | 24.8 | 18.1 | IP |
| U3067MG              | 67 | F | 305              | Y | 7  | 11 | MS              | MS | MS | WT | -   | 100  | 71.9 | 1.7  | 23.9 | ND |
| U3068MG              | 69 | M | 397              | Y | 10 | ND | MS              | ND | ND | WT | +/- | 100  | 100  | 16.6 | 8.5  | LP |
| U3071MG              | 65 | M | 309              | Y | 6  | 8  | MS              | MS | MS | WT | +/- | 100  | 98.1 | 12.0 | 11.9 | ND |
| U3073MG              | 71 | M | 481              | Y | 9  | 7  | MS              | MS | PN | WT | +   | 100  | 100  | 1.0  | 5.4  | IP |
| U3078MG              | 51 | M | 716              | Y | 10 | 5  | MS              | CL | NL | WT | +   | 100  | 100  | 0.5  | 10.2 | LP |
| U3082MG              | 70 | F | 314              | Y | 5  | 8  | PN              | PN | MS | WT | +   | 100  | 36.0 | 0.7  | 89.0 | IP |
| U3084MG <sup>g</sup> | 72 | M | 444              | Y | 10 | 5  | CL              | CL | CL | WT | +   | ND   | ND   | ND   | ND   | ND |
| U3085MG              | 68 | M | 110              | Y | 9  | ND | NL              | ND | ND | WT | ND  | ND   | ND   | ND   | ND   | IP |
| U3086MG <sup>g</sup> | 72 | M | 444              | Y | 7  | 9  | CL              | CL | CL | WT | +   | 99.5 | 97.5 | 3.2  | 8.7  | LP |
| U3088MG              | 67 | F | 464              | Y | 11 | 7  | MS              | CL | PN | WT | +/- | 99.5 | 90.5 | 78.7 | 5.1  | ND |
| U3101MG              | 73 | M | 284              | N | 6  | ND | MS              | ND | ND | WT | ND  | ND   | ND   | ND   | ND   | IP |
| U3110MG              | 58 | F | 243              | N | 5  | ND | MS              | ND | ND | WT | ND  | ND   | ND   | ND   | ND   | ND |
| U3117MG <sup>h</sup> | 57 | M | 793              | N | 5  | ND | PN              | ND | ND | WT | ND  | ND   | ND   | ND   | ND   | HP |
| U3118MG <sup>h</sup> | 57 | M | 793              | N | 4  | ND | PN              | ND | ND | WT | ND  | ND   | ND   | ND   | ND   | ND |
| U3121MG              | 64 | M | 479              | N | 5  | ND | MS              | ND | ND | WT | ND  | ND   | ND   | ND   | ND   | ND |
| U3123MG              | 64 | M | 925 <sup>i</sup> | N | 3  | ND | CL              | ND | ND | WT | ND  | ND   | ND   | ND   | ND   | LP |

M: male, F: female, Y: yes, N:no, ND: not determined, CL: classical subtype, MS: mesenchymal subtype, NL: neural subtype, PN: proneural subtype, WT: wild type

<sup>a</sup> Exon array

<sup>b</sup> NanoString

<sup>c</sup> Tumor present at the 20 week endpoint.

<sup>d</sup> LP: low proliferative capacity, IP: intermediate proliferative capacity, HP: high proliferative capacity.

<sup>e</sup> Surgical sample from recurrent tumor

<sup>f</sup> Subtype assignment based on HTA array

<sup>g</sup> Surgical sample from the same patient

<sup>h</sup> Surgical sample from the same patient

<sup>i</sup> Patient alive 2015-02-04





**Table S4. NanoString probes**

| <u>Gene name</u> |
|------------------|
| CDH4             |
| CDK6             |
| CHI3L1           |
| CLEC2B           |
| COL1A2           |
| DLL3             |
| DNM3             |
| EGFR             |
| EMP3             |
| GRIA2            |
| GRIK1            |
| IGFBP6           |
| LGALS3           |
| NCAM1            |
| OLIG2            |
| PDPN             |
| PHF11            |
| SERPINA1         |
| SLC4A4           |
| SOCS2            |
| SOX9             |
| SPRY2            |
| <u>TIMP1</u>     |

**Table S5. IDH1 mutation analysis**

| GC line | Nucleotide state <sup>a</sup> |     |   |   |
|---------|-------------------------------|-----|---|---|
|         | A                             | C   | G | T |
| U3002MG | 0                             | 191 | 1 | 0 |
| U3004MG | 0                             | 218 | 0 | 0 |
| U3004MG | 0                             | 205 | 1 | 0 |
| U3005MG | 0                             | 255 | 1 | 0 |
| U3008MG | 0                             | 207 | 0 | 0 |
| U3008MG | 0                             | 228 | 0 | 0 |
| U3009MG | 0                             | 198 | 0 | 0 |
| U3009MG | 0                             | 184 | 0 | 0 |
| U3013MG | 0                             | 132 | 0 | 0 |
| U3013MG | 0                             | 145 | 0 | 0 |
| U3016MG | 0                             | 200 | 0 | 0 |
| U3017MG | 0                             | 224 | 0 | 0 |
| U3017MG | 0                             | 242 | 0 | 0 |
| U3019MG | 0                             | 157 | 0 | 0 |
| U3020MG | 0                             | 251 | 0 | 0 |
| U3021MG | 0                             | 227 | 0 | 1 |
| U3024MG | 0                             | 244 | 0 | 0 |
| U3024MG | 0                             | 233 | 0 | 0 |
| U3027MG | 0                             | 188 | 0 | 0 |
| U3028MG | 0                             | 225 | 0 | 0 |
| U3029MG | 0                             | 250 | 0 | 1 |
| U3031MG | 0                             | 206 | 0 | 1 |
| U3031MG | 0                             | 221 | 0 | 0 |
| U3033MG | 0                             | 211 | 0 | 0 |
| U3034MG | 0                             | 87  | 0 | 0 |
| U3034MG | 0                             | 174 | 0 | 0 |
| U3035MG | 0                             | 217 | 0 | 0 |
| U3037MG | 1                             | 249 | 0 | 0 |

  

| GC line | Nucleotide state <sup>a</sup> |     |   |   |
|---------|-------------------------------|-----|---|---|
|         | A                             | C   | G | T |
| U3039MG | 0                             | 228 | 1 | 0 |
| U3042MG | 0                             | 233 | 1 | 0 |
| U3046MG | 0                             | 167 | 0 | 0 |
| U3047MG | 0                             | 164 | 1 | 0 |
| U3048MG | 0                             | 226 | 0 | 0 |
| U3051MG | 0                             | 203 | 0 | 0 |
| U3053MG | 0                             | 186 | 1 | 0 |
| U3054MG | 0                             | 254 | 0 | 0 |
| U3056MG | 0                             | 302 | 0 | 0 |
| U3060MG | 0                             | 234 | 0 | 0 |
| U3062MG | 0                             | 236 | 0 | 0 |
| U3065MG | 0                             | 254 | 0 | 0 |
| U3067MG | 0                             | 240 | 1 | 0 |
| U3068MG | 0                             | 232 | 0 | 0 |
| U3071MG | 0                             | 236 | 0 | 0 |
| U3073MG | 0                             | 196 | 0 | 1 |
| U3078MG | 0                             | 193 | 1 | 0 |
| U3082MG | 0                             | 138 | 0 | 1 |
| U3084MG | 0                             | 170 | 1 | 0 |
| U3085MG | 0                             | 206 | 1 | 0 |
| U3086MG | 0                             | 268 | 1 | 0 |
| U3088MG | 0                             | 267 | 0 | 3 |
| U3101MG | 0                             | 253 | 0 | 0 |
| U3110MG | 0                             | 262 | 0 | 0 |
| U3117MG | 0                             | 213 | 2 | 0 |
| U3118MG | 0                             | 229 | 0 | 0 |
| U3121MG | 0                             | 309 | 0 | 1 |
| U3123MG | 0                             | 208 | 0 | 0 |

<sup>a</sup> Nucleotide state at Chr2:209,113,112 is given as number of reads on the Ion Proton sequencer.

**Table S6. Number of mice injected with each GC line**

| GC line | Number of mice |
|---------|----------------|
| U3004MG | 6              |
| U3005MG | 11             |
| U3008MG | 8              |
| U3009MG | 9              |
| U3013MG | 6              |
| U3017MG | 6              |
| U3021MG | 8              |
| U3024MG | 8              |
| U3029MG | 7              |
| U3031MG | 7              |
| U3034MG | 9              |
| U3035MG | 6              |
| U3037MG | 6              |
| U3039MG | 8              |
| U3042MG | 7              |
| U3046MG | 14             |
| U3047MG | 9              |
| U3051MG | 11             |
| U3053MG | 6              |
| U3054MG | 10             |
| U3065MG | 8              |
| U3067MG | 11             |
| U3068MG | 6              |
| U3071MG | 6              |
| U3073MG | 7              |
| U3078MG | 11             |
| U3082MG | 7              |
| U3084MG | 6              |
| U3086MG | 5              |

**Table S7. Copy number alteration frequencies compared between HGCC and TCGA**

| Regions of interest<br>(Brennan et al., 2013) | HGCC-Up     | TCGA-Up     | HGCC-Down   | TCGA-Down   | Adjusted p-value <sup>a</sup> |
|-----------------------------------------------|-------------|-------------|-------------|-------------|-------------------------------|
| 10q23.31                                      | 0           | 0,001751313 | 0,916666667 | 0,887915937 | 1                             |
| 13q14.2                                       | 0,0625      | 0,010526316 | 0,520833333 | 0,435087719 | 0,179031096                   |
| 13q21.2                                       | 0,0625      | 0,014035088 | 0,416666667 | 0,414035088 | 1                             |
| 22q13.31                                      | 0,020833333 | 0,056042032 | 0,375       | 0,369527145 | 1                             |
| 9p21.3                                        | 0,041666667 | 0,036777583 | 0,770833333 | 0,749562172 | 1                             |
| 14q24.3                                       | 0,0625      | 0,054290718 | 0,395833333 | 0,309982487 | 1                             |
| 14q13.1                                       | 0,125       | 0,054290718 | 0,375       | 0,323992995 | 1                             |
| 6q26                                          | 0,0625      | 0,042031524 | 0,3125      | 0,320490368 | 1                             |
| 15q14                                         | 0,104166667 | 0,038528897 | 0,3125      | 0,267950963 | 1                             |
| 6q22.2                                        | 0,104166667 | 0,042105263 | 0,25        | 0,256140351 | 1                             |
| 1p36.23                                       | 0,083333333 | 0,126315789 | 0,3125      | 0,254385965 | 1                             |
| 11p15.5                                       | 0,083333333 | 0,03502627  | 0,125       | 0,217162872 | 1                             |
| 17p13.1                                       | 0,166666667 | 0,078809107 | 0,104166667 | 0,162872154 | 1                             |
| 19q13.33                                      | 0,125       | 0,288966725 | 0,1875      | 0,166374781 | 1                             |
| 16q23.1                                       | 0,104166667 | 0,070175439 | 0,166666667 | 0,173684211 | 1                             |
| 4q35.1                                        | 0,020833333 | 0,050788091 | 0,270833333 | 0,157618214 | 1                             |
| 16p12.1                                       | 0,083333333 | 0,064912281 | 0,1875      | 0,157894737 | 1                             |
| 2q37.1                                        | 0,083333333 | 0,052539405 | 0,166666667 | 0,103327496 | 1                             |
| 17q11.2                                       | 0,333333333 | 0,09314587  | 0,041666667 | 0,133567663 | 0,0000582                     |
| 18q22.3                                       | 0,1875      | 0,113835377 | 0,229166667 | 0,15061296  | 1                             |
| 12p13.1                                       | 0,375       | 0,11033275  | 0,104166667 | 0,119089317 | 0,000049                      |
| 3p21.31                                       | 0,291666667 | 0,10877193  | 0,145833333 | 0,092982456 | 0,010605268                   |
| 3q29                                          | 0,354166667 | 0,143607706 | 0,083333333 | 0,117338004 | 0,026041574                   |
| 3q13.31                                       | 0,354166667 | 0,11558669  | 0,083333333 | 0,096322242 | 0,00077578                    |
| 2q22.1                                        | 0,083333333 | 0,052631579 | 0,166666667 | 0,066666667 | 0,679533013                   |
| 1p22.1                                        | 0,1875      | 0,143607706 | 0,1875      | 0,082311734 | 0,758991374                   |
| 1p33                                          | 0,1875      | 0,147110333 | 0,166666667 | 0,061295972 | 0,40013598                    |
| 7p11.2                                        | 0,9375      | 0,865148862 | 0,041666667 | 0,010507881 | 0,669319705                   |
| 7q34                                          | 0,9375      | 0,828371278 | 0           | 0,012259194 | 1                             |
| 7q31.2                                        | 0,895833333 | 0,817863398 | 0           | 0,00525394  | 1                             |
| 7q21.2                                        | 0,9375      | 0,833625219 | 0           | 0,010507881 | 1                             |
| 12q14.1                                       | 0,4375      | 0,229422067 | 0,083333333 | 0,084063047 | 0,170670978                   |
| 4q12                                          | 0,1875      | 0,180385289 | 0,166666667 | 0,071803853 | 1                             |
| 1q32.1                                        | 0,291666667 | 0,266666667 | 0,020833333 | 0,028070175 | 1                             |
| 12q15                                         | 0,4375      | 0,143607706 | 0,0625      | 0,112084063 | 0,000047                      |
| 12p13.32                                      | 0,375       | 0,119089317 | 0,0625      | 0,087565674 | 0,000234404                   |
| 3q26.33                                       | 0,458333333 | 0,182136602 | 0,041666667 | 0,047285464 | 0,00115865                    |
| 1q44                                          | 0,25        | 0,176882662 | 0           | 0,061295972 | 1                             |
| 19q12                                         | 0,229166667 | 0,375438596 | 0,0625      | 0,073684211 | 1                             |
| 2p24.3                                        | 0,020833333 | 0,07530648  | 0,1875      | 0,064798599 | 0,146734462                   |
| 8q24.21                                       | 0,208333333 | 0,12084063  | 0,1875      | 0,078809107 | 0,160782873                   |
| 1p36.21                                       | 0,083333333 | 0,168421053 | 0,166666667 | 0,112280702 | 1                             |
| 13q34                                         | 0,166666667 | 0,047368421 | 0,3125      | 0,301754386 | 0,080638435                   |
| 17q25.1                                       | 0,229166667 | 0,150877193 | 0,020833333 | 0,075438596 | 1                             |
| 11p13                                         | 0,145833333 | 0,050788091 | 0,083333333 | 0,171628722 | 0,371203133                   |

<sup>a</sup> p-values for differences in alteration frequencies between HGCC and TCGA using a Chi-square test and Holms correction for multiple testing.



## **SUPPLEMENTAL EXPERIMENTAL PROCEDURES**

### **GBM surgical samples and glioma cell cultures**

Tumor tissue was minced with a scalpel, passed through syringes with 18- and 22-gauge needles, and then incubated in a 1:1 mixture of Accutase (eBioscience, San Diego, CA, USA) and TrypLE (Invitrogen) for 10 minutes at 37° C. The dissociated cells were washed twice with DMEM/F12 medium followed by centrifugation at 600 rpm for 8 minutes before being plated onto uncoated dishes in Neurobasal and DMEM/F12 media (1:1 mix) containing N2 and B27 supplements (Invitrogen) and human recombinant FGF2 and EGF (10 ng/ml, PEPROTECH). Five to 7 days later, the spheres were plated onto Primaria dishes (BD Biosciences) coated with mouse laminin (Sigma-Aldrich) to allow adherent growth as described previously (Pollard et al., 2009). Cells were maintained and passaged as adherent cultures and as early as possible (usually after passage 2) aliquots were taken from each passage and stored in a freezer at -150° C or in liquid nitrogen. All GC lines have reached at least 10 passages and most more than 20.

### **STR genotyping and data analysis**

STR genotyping was performed using the AmpF $\ell$ STR® Identifiler™ PCR amplification kit (Applied Biosystems), which amplifies 15 STR loci and the Amelogenin locus. These 15 loci were CSF1PO, D13S317, D16S539, D18S51, D19S433, D21S11, D2S1338, D31S1358, D5S818, D7S820, D8S1179, FGA, TH01, TPOX and vWA. To each reaction tube 5  $\mu$ l DNA (0.1 ng/ $\mu$ l) was added to obtain a total volume of 12.5 $\mu$ l. The PCR reaction was performed in accordance with the manufacturer's instructions (AmpF $\ell$ STR® Identifiler™ PCR Amplification Kit User Guide. Life Technologies Corporation. 2012). The data were processed by a 3730XL

Analyzer (Applied Biosystems) with GeneScan™ LIZ 500™ Size Standard (Applied Biosystem) and thereafter interpreted using the ABI PRISM® GeneMapper™ Software Version 3.0 (Applied Biosystem).

### **Cell line classification utilizing the $k$ -nearest neighbors approach and bootstrap aggregation**

From Verhaak (Verhaak et al., 2010) we obtained a list of 840 transcripts expressed differentially by the different TCGA subtypes of glioblastoma, of which 765 (91%) mapped to our expression dataset. Log2 scale TCGA mRNA expression data (n=529, Affymetrix platform) and HGCC mRNA expression data (n=48) were both normalized by Z-score transformation. Subtype assignments for the TCGA samples were obtained from the TCGA server. We applied  $k$ -Nearest Neighbor classification (KNN, using the Matlab function `knnclassify`) to assign a subtype to each of these 48 samples, employing the Pearson correlation between vectors of Z-scores for the 746 subtype marker transcripts as the similarity metric. The choice of the KNN tuning parameter  $k$  (set to a value of 11) and the choice of distance metric were both informed by cross-validation, among the set of TCGA reference cases (data not shown). To determine the confidence of subclass classification, we applied bootstrap simulation (Caprile et al., 2004, James et al., 2013) where each HGCC cell line was classified 1000 times, each time using a resampled TCGA dataset (529 TCGA cases randomly selected with replacement). Following this simulation, the relative weight of each subtype in each cell line (Figures 2 and 6B) was defined as the proportion of the 1000 simulations in which that cell line was assigned to that class.

### **Isomap analysis of the GC lines**

In addition to classification (supervised analysis), Isomapping (Tenenbaum et al., 2000), a non-linear procedure for dimensionality reduction that has previously been successfully applied to classification of cancer (Nilsson et al., 2004), was used to visualize the space of the GC lines and TCGA samples in two dimensions. Normalized expression values across the 48 cell lines and 529 TCGA tissue samples for 765 of the 840 classifier genes (Verhaak et al., 2010) represented on both Affymetrix Exon 1.0ST and U133A microarray platforms were transformed into  $z$ -scores (for each gene in all samples in each dataset). The  $z$ -scores were combined and the data matrix used for isomapping was generated as described (<http://isomap.stanford.edu/>). The resulting isomap provides a good assessment of the similarities and differences between samples and allows visual inspection and comparison of the assignment of subtypes to the GC lines and TCGA tumors. All data manipulations were performed in the R (R Core Team, 2014) and MATLAB (The MathWorks, Inc., Natick, MA, United States) software.

### **Whole-exome sequencing and data analysis of IDH1 codon R132**

For each sample, 100 ng of DNA was distributed to 12 separate primer pools and amplified according to the Ion AmpliSeq™ Exome Library Preparation protocol (Revision A.0, Life Technologies). The separate PCR products were pooled and primer sequences were partially digested. Adaptors were ligated and resulting amplicons were purified using Agencourt AMPure XP Reagent (Beckman Coulter) and eluted in amplification mix (Platinum PCR SuperMix High Fidelity and Library Amplification Primer Mix, Life Technologies). Size-selection and purification was conducted using Agencourt AMPure XP Reagent. The amplicons were quantified using the Agilent Bioanalyzer instrument with Agilent High Sensitivity DNA kit.



Emulsion PCR was performed on the Ion OneTouch 2 system using Ion PI Template OT2 200 Kit v3 chemistry, followed by enrichment using Ion OneTouch ES. Samples were loaded on an Ion PI chip Kit v2 and sequenced on the Ion Proton System using Ion PI Sequencing 200 Kit v3 (200 bp read length, Life Technologies) chemistry. DNA samples for the mother and the father were barcoded and multiplexed on one PI chip, while the fetal DNA was run on a separate PI chip. The sequencing generated over 30 million reads/sample of average length >150 bp.

Alignment of reads to the human hg19 assembly and variant detection was performed using v4.0 of the Torrent Suite Software. SNPs and indel data were stored in a local installation of the CanvasDB in-house database system (Ameur et al., 2014) together with variant annotation information obtained from ANNOVAR (Wang et al., 2010) and dbSNP137. Nucleotide at chr2:209,113,112 (middle base in codon 132 of the IDH1 gene) was analyzed for substitution from C to T.

### **Analysis of gene expression by NanoString Technology of surgical GBM samples and GC lines**

RNA extracted from 22 fresh, frozen specimens of human glioma using TRIzol and RNA from the corresponding GCs (prepared in the same manner as the Affymetrix Exon Array) were subjected to a custom made assay of gene expression by NanoString Technology. The NanoString probe set (Table S4) was designed by Drs. Cameron Brennan and Jason Huse at the Brain Tumor Center, Memorial Sloan-Kettering Cancer Center, New York. Gene expression in our GBM tissue/GC line samples was related to that of the TCGA tumor samples with known subtype to predict subtype, using the same methodology (KNN classifier) as above.

### **Proliferation assay**

Proliferation of all the cell lines was assayed twice. For the AlamarBlue assay, 200  $\mu$ l of cell suspension ( $2.5 \times 10^5$  cells/ml) was placed into each well of Primaria 96-well plates (BD Biosciences), performing triplicates for each time-point and cell line and three wells with media alone in each experiment for determination of background. On days 1, 4 and 7, 20  $\mu$ l AlamarBlue was added to each well, the plate was incubated at 37° C for 2 more hours, and fluorescence then measured with a Wallac 1420 VICTOR plate reader (PerkinElmer).

In the case of the trypan blue test of cell viability 2 ml of cell suspension ( $2.5 \times 10^4$  cells/ml) was seeded into each well of Primaria 6-well plates (BD Biosciences), with duplicate wells for each time-point and cell line. On days 1, 4 and 7, the cells were detached and the number of viable cells excluding trypan blue determined with an automated cell counter (Invitrogen). The cell density on day 4 and 7 were normalized to that on day 1.

### **Immunofluorescence stainings**

Adherent cells seeded onto polyornithine/laminin-coated coverslips were washed twice with phosphate-buffered saline (PBS) and then fixed in 4% formaldehyde/PBS for 20 min at room temperature. The cells were next blocked and permeabilized with 5% normal goat serum in PBS and 0.3% Triton-X-100 for one hour at room temperature and then incubated with primary antibodies (diluted 1:200 in PBS containing 1% bovine serum albumin and 0.3% Triton-X-100) overnight at 4° C. After being washed three times in PBS, the cells were incubated with fluorescent-

labeled secondary antibodies (diluted 1:400 in the same buffer) for 2 h 30 min at room temperature. Thereafter, the cells were washed in PBS, stained with Hoechst (2  $\mu\text{g}/\text{mL}$  in PBS) for 20 min at room temperature and then washed in PBS again. Following this final wash, the coverslips were mounted with Fluoromount (DAKO).

The primary antibodies used were rabbit anti-SOX2 (Millipore AB5603), mouse anti-GFAP (Sigma G3893), rabbit anti-OLIG2 (Millipore AB9610), mouse anti-NES (Millipore MAB5326), rabbit anti-S100B (DAKO Z0311), and mouse anti-TUBB3 (Covance MMS-435P). The fluorescent-labeled secondary antibodies used were goat anti-mouse Alexa 488 (Invitrogen A11029) and goat anti-rabbit Alexa 555 (Invitrogen A21430). Images were acquired with a Zeiss AxioImager fluorescence microscope at 200X magnification. Automatic counting of nuclear stains (DAPI, SOX2, OLIG2) were performed with ImageJ software (Schneider et al., 2012) while Nestin and GFAP stainings were manually counted.

### **Analysis of the tumorigenicity of the GC lines**

All animal experiments were performed in accordance with the rules and regulations of Uppsala University and approved by the local animal ethics committee. Neonatal non-obese diabetic/severe combined immunodeficiency (NOD/SCID) mice (P1-3) were injected intracerebrally with  $1.0 \times 10^5$  human GCs of 30 different lines dissolved in 2  $\mu\text{l}$  DMEM/F12 (Table S2). The animals were monitored three times a week and euthanized upon any signs of illness or, otherwise, after 20 weeks. Their brains were fixed in 4% formalin at 4° C for at least 48 h, embedded in paraffin, sectioned, stained with hematoxylin and eosin (H&E) and examined for the presence of xenograft

tumors. Images were acquired at the SciLife Lab Tissue Profiling facility using an automated slide scanner (Aperio Scanscope AT, Leica Microsystems, Germany).

### **Immunohistochemical analysis**

Tissue sections of formalin-fixed, paraffin-embedded NOD-SCID brains injected with human GC lines were deparaffinized and dehydrated prior to antigen retrieval in acidic buffer (H-3300, Vector Labs, CA, United States) in a pressure cooker. Next, the sections were incubated with the antibody towards STEM121, a human-specific cytoplasmic marker (Stem Cell Inc., diluted 1:1000 in PBS containing 5% NGS and 0.3% Triton-X-100) overnight at 4° C. The sections were then washed 4 times with PBS containing 0.05% Tween-20 and specific binding finally visualized with a UltraVision HRP polymer detection system (Thermo Scientific), in accordance with the manufacturer's instructions. Images were acquired at the SciLife Lab Tissue Profiling facility using an automated slide scanner (Aperio Scanscope AT, Leica Microsystems, Germany).

### **Analysis of aberrations in DNA Copy Number**

For figure 6A-B, we defined the frequency of amplification and deletion, respectively, as the fraction of samples for which copy number signal at a given genomic locus is higher than a threshold  $T$  (amplified) or lower than a threshold  $-T$  (deleted), where  $T$  was set to 1 standard deviation. (Different thresholds in the range 0.5 to 2.0 standard deviations all produced qualitatively similar results as Figure 6, correlation between TCGA and HGCC 0.7 or higher, not shown). Regions of Interest (ROI) were acquired from (Brennan et al., 2013) Table S3 (DNA Copy-Number GISTIC significant peaks). Per-gene values in these regions were averaged for HGCC and TCGA CNA data to

produce a per-region score. Each region was considered to be amplified if the score was  $>0.1$  and to have a deletion if the score was  $<-0.1$ . In Figure 6C a subset of regions are shown, matching Figure 5A in (Brennan et al., 2013). For each ROI a Chi-squared test was used to call a significant difference in occurrence between the number of amplifications and deletions in HGCC and TCGA. These values were corrected using the Holm procedure in R (`p.adjust(x,method="holm")`) and significance is shown as \* ( $<0.05$ ), \*\* ( $<0.01$ ) or \*\*\* ( $<0.001$ ). This was done to control the Family Wise Error Rate (FWER) when calling a significant difference. The same test was conducted for each subtype separately to assess the per-subtype differences between HGCC and TCGA samples. A full list of alteration frequencies and p-values are shown in Table S7 and Table S8.

#### **Analysis of the stability of the molecular subtypes of GCs in culture and *in vivo***

Neonatal NOD/SCID mice (P1-3) were injected intracerebrally with three different human GC lines (U3020MG, U3047MG and U3065MG), two mice with each cell line and sacrificed upon any sign of illness. The tumor tissue was dissected out and one portion fixed with formalin and embedded in paraffin for H&E staining (as described above), another portion stored at  $-70^{\circ}$  C for later RNA extraction and a third portion dissociated enzymatically into single cells and for establishment of a GC culture subjected to two passages. Total RNA was extracted from the GC lines prior to transplantation, from the xenograft tumor tissue and from cultured explant cells using the miRNeasy Mini kit (Qiagen). This RNA was subsequently labeled and hybridized onto Affymetrix human transcriptome 2.0 arrays following the instructions of the manufacturer, and the expression values were RMA-normalized using the Affymetrix Expression Console software. The molecular subtypes of the samples

were determined by comparison to the reference TCGA tissue samples and depicted in two-dimensional space by isomapping, as described above. For the latter analysis, 746 subtype classification genes (Verhaak et al., 2010) were used, that were represented on both the Affymetrix HTA 2.0 and U133 microarray platforms.

## SUPPLEMENTAL REFERENCES

- AMEUR, A., BUNIKIS, I., ENROTH, S. & GYLLENSTEN, U. 2014. CanvasDB: a local database infrastructure for analysis of targeted- and whole genome re-sequencing projects. *Database-the Journal of Biological Databases and Curation*.
- BRENNAN, C. W., VERHAAK, R. G. W., MCKENNA, A., CAMPOS, B., NOUSHMEHR, H., SALAMA, S. R., ZHENG, S. Y., CHAKRAVARTY, D., SANBORN, J. Z., BERMAN, S. H., BEROUKHIM, R., BERNARD, B., WU, C. J., GENOVESE, G., SHMULEVICH, I., BARNHOLTZ-SLOAN, J., ZOU, L. H., VEGESNA, R., SHUKLA, S. A., CIRIELLO, G., YUNG, W. K., ZHANG, W., SOUGNEZ, C., MIKKELSEN, T., ALDAPE, K., BIGNER, D. D., VAN MEIR, E. G., PRADOS, M., SLOAN, A., BLACK, K. L., ESCHBACHER, J., FINOCCHIARO, G., FRIEDMAN, W., ANDREWS, D. W., GUHA, A., IACocca, M., O'NEILL, B. P., FOLTZ, G., MYERS, J., WEISENBERGER, D. J., PENNY, R., KUCHERLAPATI, R., PEROU, C. M., HAYES, D. N., GIBBS, R., MARRA, M., MILLS, G. B., LANDER, E., SPELLMAN, P., WILSON, R., SANDER, C., WEINSTEIN, J., MEYERSON, M., GABRIEL, S., LAIRD, P. W., HAUSSLER, D., GETZ, G., CHIN, L. & NETWORK, T. R. 2013. The Somatic Genomic Landscape of Glioblastoma. *Cell*, 155, 462-477.
- CAPRILE, B., MERLER, S., FURLANELLO, C. & JURMAN, G. 2004. Exact bagging with k-nearest neighbour classifiers. *Multiple Classifier Systems, Proceedings*, 3077, 72-81.
- JAMES, G., WITTEN, D., HASTIE, T. & TIBSHIRANI, R. 2013. *An introduction to statistical learning : with applications in R*, New York, Springer.
- NILSSON, J., FIORETOS, T., HOGLUND, M. & FONTES, M. 2004. Approximate geodesic distances reveal biologically relevant structures in microarray data. *Bioinformatics*, 20, 874-80.
- POLLARD, S. M., YOSHIKAWA, K., CLARKE, I. D., DANОВI, D., STRICKER, S., RUSSELL, R., BAYANI, J., HEAD, R., LEE, M., BERNSTEIN, M., SQUIRE, J. A., SMITH, A. & DIRKS, P. 2009. Glioma Stem Cell Lines Expanded in Adherent Culture Have Tumor-Specific Phenotypes and Are Suitable for Chemical and Genetic Screens. *Cell Stem Cell*, 4, 568-580.

- R CORE TEAM 2014. R: A Language and Environment for Statistical Computing. *R Foundation for Statistical Computing*.
- SCHNEIDER, C. A., RASBAND, W. S. & ELICEIRI, K. W. 2012. NIH Image to ImageJ: 25 years of image analysis. *Nat Methods*, 9, 671-5.
- TENENBAUM, J. B., DE SILVA, V. & LANGFORD, J. C. 2000. A global geometric framework for nonlinear dimensionality reduction. *Science*, 290, 2319-2323.
- VERHAAK, R. G. W., HOADLEY, K. A., PURDOM, E., WANG, V., QI, Y., WILKERSON, M. D., MILLER, C. R., DING, L., GOLUB, T., MESIROV, J. P., ALEXE, G., LAWRENCE, M., O'KELLY, M., TAMAYO, P., WEIR, B. A., GABRIEL, S., WINCKLER, W., GUPTA, S., JAKKULA, L., FEILER, H. S., HODGSON, J. G., JAMES, C. D., SARKARIA, J. N., BRENNAN, C., KAHN, A., SPELLMAN, P. T., WILSON, R. K., SPEED, T. P., GRAY, J. W., MEYERSON, M., GETZ, G., PEROU, C. M. & HAYES, D. N. 2010. Integrated Genomic Analysis Identifies Clinically Relevant Subtypes of Glioblastoma Characterized by Abnormalities in PDGFRA, IDH1, EGFR, and NF1. *Cancer Cell*, 17, 98-110.
- WANG, K., LI, M. Y. & HAKONARSON, H. 2010. ANNOVAR: functional annotation of genetic variants from high-throughput sequencing data. *Nucleic Acids Research*, 38.
